# Supplementary material for: Prediction of two-dimensional CP3 as a promising electrode material with a record-high capacity for Na ions
Source: Royal Society of Chemistry journal article supplement (doi:10.1039/d0na00746c), 2020-01-01
Supplement: d0na00746c1.pdf [file d0na00746c1.pdf]

*Supporting Information for*

**Prediction of Two Dimensional CP<sub>3</sub> as a Promising Electrode  
Material with a Record-High Capacity for Na Ions**

Zishuang Cheng,<sup>1</sup> Xiaoming Zhang,<sup>1,2,\*</sup> Hui Zhang,<sup>1</sup> Jianbo Gao,<sup>3</sup> Heyan Liu,<sup>1,2</sup> Xiao Yu,<sup>1,2</sup> Xuefang Dai,<sup>1</sup> Guodong Liu,<sup>1</sup> and Guifeng Chen<sup>1,\*</sup>

<sup>1</sup>School of Materials Science and Engineering, Hebei University of Technology, Tianjin 300130, China.

<sup>2</sup>State Key Laboratory of Baiyunobo Rare Earth Resource Researches and Comprehensive Utilization, Baotou Research Institute of Rare Earths, Baotou, 014030, China.

<sup>3</sup>Centre of Excellence for Advanced Materials, Dongguan 523808, China.

E-mail: zhangxiaoming87@hebut.edu.cn; cgfchen@hebut.edu.cn.

## **Contents of Supporting Information**

1. The cleavage energy of CP<sub>3</sub> monolayer (Figure S1).
2. The optimized structures of CP<sub>3</sub> monolayer adsorption Li/Na (Figure S2).
3. Mechanical parameters for the CP<sub>3</sub> monolayer before and after adsorption Li/Na (Table S1).

**1. Cleavage Energy:** Cleavage energy was calculated by using five-layers system as shown in the following figure, and the value was calculated by the following formula:

$$E_{cleavage} = (E_{5L+d} - E_{5L})/S$$

Where  $E_{cleavage}$ ,  $E_{5L+d}$ ,  $E_{5L}$ , and  $S$  represent the cleavage energy, the total energy of 5L slab with and without displacement, and the total area of the unit cell, respectively. From the Figure S1, we find that the cleavage energy of CP<sub>3</sub> is 0.65 J/m<sup>2</sup> and agrees with the previous work (0.57 J/m<sup>2</sup>) [*Phys. Rev. B.* 2020, 101, 195305]. And this low value suggests that CP<sub>3</sub> monolayer could be cleavable from its bulk structure.

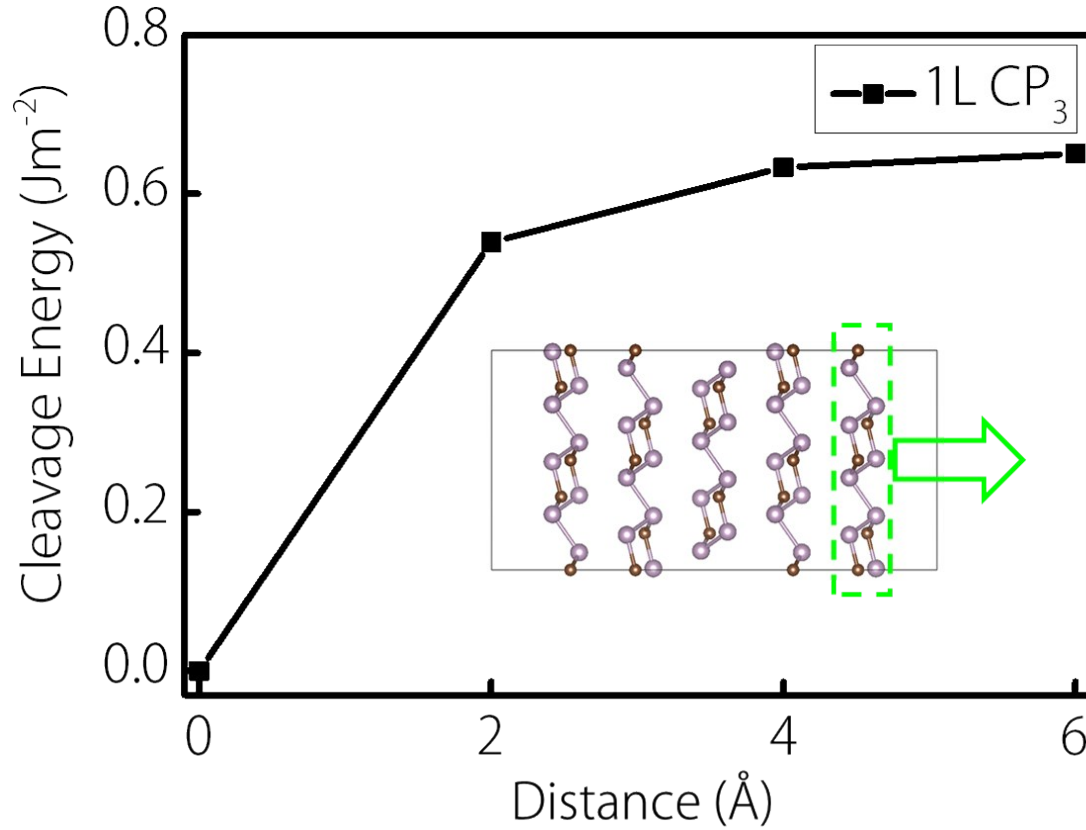

Figure S1 Cleavage energy of CP<sub>3</sub> is as a function of the separation distance between 1L and the remainder of the 5L-slab. The distance changes from 0 to 6 Å, and the distance zero means the equilibrium distance of the bulk structure. The 5L-slab is shown in map.

2.

(a)

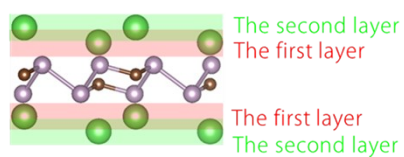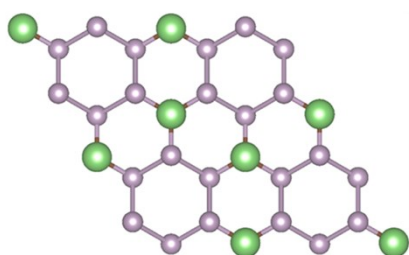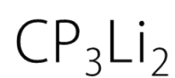

(b)

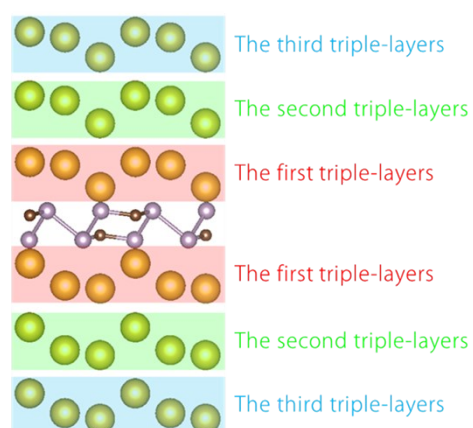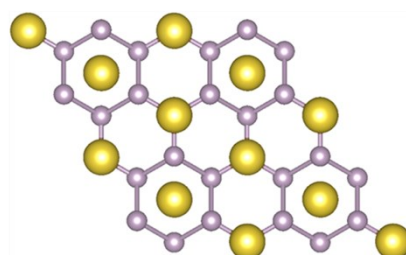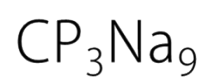

Figure S2 (a) The optimized structure of  $\text{CP}_3\text{Li}_2$  on the top and side views. (b) The optimized structure of  $\text{CP}_3\text{Na}_9$  on the top and side views. And the number of layers is marked in their top views.

3. The elastic constants of CP<sub>3</sub> monolayer are  $C_{11} = C_{22} = 83.7$  N/m,  $C_{12} = 19.1$  N/m, and  $C_{44} = 32.5$  N/m. After adsorption Li/Na atoms, we find the elastic constants of CP<sub>3</sub> monolayer have not changed much. And these values all satisfy the Born criteria ( $C_{44} > 0$ ;  $C_{11}C_{22} - C_{12}^2 > 0$ ), which indicates the CP<sub>3</sub> monolayer before and after adsorption Li/Na are mechanically stable. Besides, the Young modulus could be calculated by  $E = (C_{11}^2 - C_{12}^2)/C_{11}$  and the Poisson ratio is  $\nu = C_{12}/C_{11}$ . The results are shown in the Table S1.

Table S1 Mechanical parameters for the CP<sub>3</sub> monolayer before and after adsorption Li/Na

|                 | $C_{11}$ (N/m) | $C_{22}$ (N/m) | $C_{44}$ (N/m) | $C_{12}$ (N/m) | $E$ (N/m) | $\nu$ |
|-----------------|----------------|----------------|----------------|----------------|-----------|-------|
| <b>before</b>   | 83.7           | 83.7           | 32.5           | 19.1           | 79.3      | 0.23  |
| <b>After Li</b> | 81.9           | 81.9           | 33.4           | 15.1           | 79.1      | 0.18  |
| <b>After Na</b> | 78.2           | 78.2           | 30.1           | 17.9           | 74.1      | 0.23  |
